# Supplementary material for: Associations of HLA Polymorphisms with Chronic Kidney Disease in Japanese Rheumatoid Arthritis Patients
Source: MDPI journal article supplement (doi:10.3390/genes14071470), 2023-07-19
Supplement: s1 [file s1]

Supplementary Table S1. *DRB1* allele carrier frequency in RA patients with CKD and controls.

|                            | CKD(+)RA<br>(n=351) | Healthy<br>control<br>(n=413) | <i>P</i>               | OR   | <i>P<sub>c</sub></i>   | 95%CI         |
|----------------------------|---------------------|-------------------------------|------------------------|------|------------------------|---------------|
| <i>DRB1*01:01</i>          | 54 (15.4)           | 41 (9.9)                      | 0.0275                 | 1.65 | 0.8247                 | (1.07-2.55)   |
| <i>DRB1*03:01</i>          | 1 (0.3)             | 2 (0.5)                       | 1.0000                 | 0.59 | NS                     | (0.05-6.50)   |
| <i>DRB1*04:01</i>          | 19 (5.4)            | 7 (1.7)                       | 0.0080                 | 3.32 | 0.2397                 | (1.38-7.99)   |
| <i>DRB1*04:03</i>          | 10 (2.8)            | 19 (4.6)                      | 0.2554                 | 0.61 | NS                     | (0.28-1.33)   |
| <i>DRB1*04:04</i>          | 3 (0.9)             | 0 (0.0)                       | 0.0965                 | 8.31 | NS                     | (0.43-161.35) |
| <i>DRB1*04:05</i>          | 162 (46.2)          | 87 (21.1)                     | 2.04X10 <sup>-13</sup> | 3.21 | 6.11X10 <sup>-12</sup> | (2.34-4.41)   |
| <i>DRB1*04:06</i>          | 11 (3.1)            | 34 (8.2)                      | 0.0031                 | 0.36 | 0.0926                 | (0.18-0.72)   |
| <i>DRB1*04:07</i>          | 3 (0.9)             | 3 (0.7)                       | 1.0000                 | 1.18 | NS                     | (0.24-5.87)   |
| <i>DRB1*04:10</i>          | 16 (4.6)            | 14 (3.4)                      | 0.4572                 | 1.36 | NS                     | (0.65-2.83)   |
| <i>DRB1*07:01</i>          | 2 (0.6)             | 3 (0.7)                       | 1.0000                 | 0.78 | NS                     | (0.13-4.71)   |
| <i>DRB1*08:02</i>          | 18 (5.1)            | 38 (9.2)                      | 0.0364                 | 0.53 | NS                     | (0.30-0.95)   |
| <i>DRB1*08:03</i>          | 26 (7.4)            | 61 (14.8)                     | 0.0013                 | 0.46 | 0.0405                 | (0.28-0.75)   |
| <i>DRB1*08:09</i>          | 0 (0.0)             | 1 (0.2)                       | 1.0000                 | 0.39 | NS                     | (0.02-9.63)   |
| <i>DRB1*09:01</i>          | 102 (29.1)          | 105 (25.4)                    | 0.2884                 | 1.20 | NS                     | (0.87-1.65)   |
| <i>DRB1*10:01</i>          | 5 (1.4)             | 2 (0.5)                       | 0.2571                 | 2.97 | NS                     | (0.57-15.40)  |
| <i>DRB1*11:01</i>          | 10 (2.8)            | 21 (5.1)                      | 0.1419                 | 0.55 | NS                     | (0.25-1.18)   |
| <i>DRB1*12:01</i>          | 21 (6.0)            | 29 (7.0)                      | 0.6601                 | 0.84 | NS                     | (0.47-1.51)   |
| <i>DRB1*12:02</i>          | 9 (2.6)             | 10 (2.4)                      | 1.0000                 | 1.06 | NS                     | (0.43-2.64)   |
| <i>DRB1*13:01</i>          | 0 (0.0)             | 5 (1.2)                       | 0.0658                 | 0.11 | NS                     | (0.01-1.92)   |
| <i>DRB1*13:02</i>          | 34 (9.7)            | 57 (13.8)                     | 0.0927                 | 0.67 | NS                     | (0.43-1.05)   |
| <i>DRB1*14:02</i>          | 1 (0.3)             | 0 (0.0)                       | 0.4594                 | 3.54 | NS                     | (0.14-87.16)  |
| <i>DRB1*14:03</i>          | 6 (1.7)             | 21 (5.1)                      | 0.0168                 | 0.32 | 0.5028                 | (0.13-0.81)   |
| <i>DRB1*14:04</i>          | 0 (0.0)             | 1 (0.2)                       | 1.0000                 | 0.39 | NS                     | (0.02-9.63)   |
| <i>DRB1*14:05</i>          | 7 (2.0)             | 14 (3.4)                      | 0.2732                 | 0.58 | NS                     | (0.23-1.45)   |
| <i>DRB1*14:06</i>          | 19 (5.4)            | 16 (3.9)                      | 0.3857                 | 1.42 | NS                     | (0.72-2.81)   |
| <i>DRB1*14:07</i>          | 1 (0.3)             | 1 (0.2)                       | 1.0000                 | 1.18 | NS                     | (0.07-18.89)  |
| <i>DRB1*14:54</i>          | 27 (7.7)            | 28 (6.8)                      | 0.6745                 | 1.15 | NS                     | (0.66-1.98)   |
| <i>DRB1*15:01</i>          | 37 (10.5)           | 68 (16.5)                     | 0.0202                 | 0.60 | 0.6060                 | (0.39-0.92)   |
| <i>DRB1*15:02</i>          | 56 (16.0)           | 89 (21.5)                     | 0.0522                 | 0.69 | NS                     | (0.48-1.00)   |
| <i>DRB1*16:02</i>          | 5 (1.4)             | 5 (1.2)                       | 1.0000                 | 1.18 | NS                     | (0.34-4.11)   |
| DR6( <i>DRB1*13, *14</i> ) | 93 (26.5)           | 137 (33.2)                    | 0.0481                 | 0.73 |                        | (0.53-0.99)   |

Allele carrier frequencies are shown in parentheses (%). Association was tested by Fisher's exact test using 2X2 contingency tables. RA: rheumatoid arthritis, CKD: chronic kidney disease, OR: odds ratio, CI: confidence interval, *P<sub>c</sub>*: corrected *P*.
