# Supplementary material for: Associations of HLA Polymorphisms with Chronic Kidney Disease in Japanese Rheumatoid Arthritis Patients
Source: MDPI journal article supplement (doi:10.3390/genes14071470), 2023-07-19
Supplement: s1 [file s1]

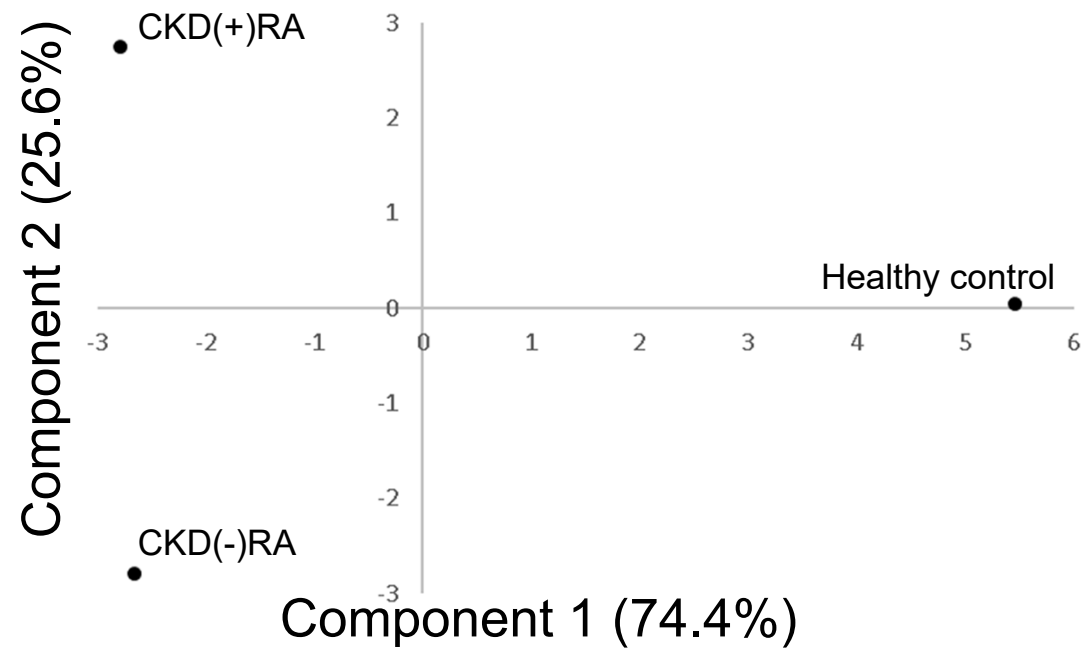

**Supplementary Figure S1. Results of principal component analyses of CKD(+)RA, CKD(-)RA, and healthy control groups based on allele frequencies of *DRB1*.** Scores plots for principal component analyses of CKD(+)RA, CKD(-)RA, and healthy controls. RA: rheumatoid arthritis, CKD: chronic kidney disease.
